# Supplementary material for: Adequate prediction for inhibitor affinity of Aβ40 protofibril using the linear interaction energy method
Source: PubMed Central journal article supplement (PMC9063661; doi:10.1039/c9ra01177c), 2019-04-23
Supplement: RA-009-C9RA01177C-s001.pdf [file RA-009-C9RA01177C-s001.pdf]

## Supporting Information

### Adequate Prediction for Inhibitor Affinity of 12A $\beta$ <sub>40</sub> Photofibril Using Linear Interaction Energy Method

Son Tung Ngo,<sup>a,b,\*</sup> Binh Khanh Mai,<sup>c,†,\*</sup> Philippe Derreumaux<sup>def</sup> and Van V. Vu<sup>g</sup>

<sup>a</sup>Laboratory of Theoretical and Computational Biophysics, Ton Duc Thang University, Ho Chi Minh City, Vietnam

<sup>b</sup>Faculty of Applied Sciences, Ton Duc Thang University, Ho Chi Minh City, Vietnam

<sup>c</sup>Institute for Computational Science and Technology (ICST), Quang Trung Software City, Ho Chi Minh City, Vietnam

<sup>d</sup>Laboratoire de Biochimie Theorique, UPR 9080 CNRS, IBPC, Universite Paris 7, 13 rue Pierre et Marie Curie, 75005, Paris, France

<sup>e</sup>Laboratory of Theoretical Chemistry, Ton Duc Thang University, Ho Chi Minh City, Vietnam

<sup>f</sup>Faculty of Pharmacy, Ton Duc Thang University, Ho Chi Minh City, Vietnam

<sup>g</sup>NTT Hi-Tech Institute, Nguyen Tat Thanh University, Ho Chi Minh City, Vietnam

<sup>†</sup>Present address: Department of Organic Chemistry, Stockholm University, SE-106 91 Stockholm, Sweden.

\*Emails: [ngosontung@tdtu.edu.vn](mailto:ngosontung@tdtu.edu.vn) and [binh.khanh.mai@su.se](mailto:binh.khanh.mai@su.se)

**Table S1.** List of amyloid inhibitors with PubChem ID and experimental  $K_i$  values.

| N <sup>o</sup> | Compound                  | Pubchem ID | Structure                                                                            | $K_i$ (nM) |
|----------------|---------------------------|------------|--------------------------------------------------------------------------------------|------------|
| 1              | CHEMBL81260 <sup>1</sup>  | 10064445   | 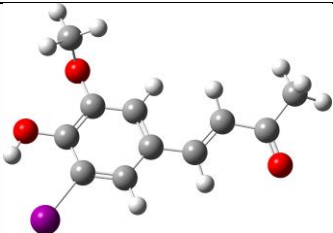   | 19.97      |
| 2              | CHEMBL78012 <sup>2</sup>  | 10133297   |    | 15.00      |
| 3              | CHEMBL74704 <sup>3</sup>  | 10184360   |    | 0.11       |
| 4              | CHEMBL92852 <sup>4</sup>  | 10335228   |   | 7.20       |
| 5              | CHEMBL330529 <sup>4</sup> | 10422457   |  | 10.00      |
| 6              | CHEMBL328660 <sup>4</sup> | 10426074   |  | 1.70       |
| 7              | CHEMBL93884 <sup>4</sup>  | 10444413   |  | 46.00      |
| 8              | CHEMBL55401 <sup>5</sup>  | 10496851   |  | 1.90       |

|    |                            |          |                                                                                      |        |
|----|----------------------------|----------|--------------------------------------------------------------------------------------|--------|
| 9  | CHEMBL58092 <sup>5</sup>   | 10844298 | 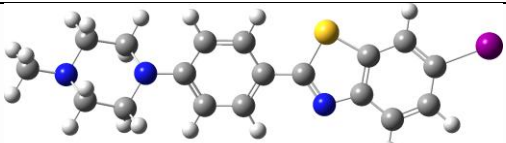   | 5.40   |
| 10 | CHEMBL78621 <sup>3</sup>   | 11054105 |    | 242.00 |
| 11 | CHEMBL328430 <sup>4</sup>  | 11129817 |    | 1.90   |
| 12 | CHEMBL375934 <sup>6</sup>  | 11574659 |    | 13.20  |
| 13 | CHEMBL224643 <sup>6</sup>  | 11632242 |   | 22.60  |
| 14 | CHEMBL388844 <sup>6</sup>  | 11703303 |  | 72.50  |
| 15 | CHEMBL92802 <sup>4</sup>   | 11821524 |  | 8.60   |
| 16 | CHEMBL1908959 <sup>7</sup> | 1358096  |  | 10.09  |

|    |                                                                                           |          |                                                                                      |        |
|----|-------------------------------------------------------------------------------------------|----------|--------------------------------------------------------------------------------------|--------|
| 17 | CHEMBL305634 <sup>2</sup>                                                                 | 15521136 | 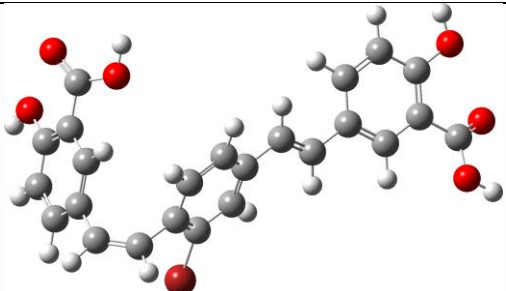   | 0.19   |
| 18 | CHEMBL76112 <sup>2</sup>                                                                  | 15521135 |    | 0.13   |
| 19 | CHEMBL74348 <sup>2</sup>                                                                  | 15521137 |   | 0.27   |
| 20 | NAPROXEN <sup>8</sup>                                                                     | 156391   |  |        |
| 21 | (3Z,5E)-6-[4-(3-fluoropropoxy)-3-methoxyphenyl]-4-hydroxyhexa-3,5-dien-2-one <sup>1</sup> | 16087292 |  | 316.30 |
| 22 | CHEMBL387276 <sup>1</sup>                                                                 | 16087303 |  | 232.70 |
| 23 | (3Z,5E)-6-[4-(2-fluoroethoxy)-3-methoxyphenyl]-4-hydroxyhexa-3,5-dien-2-one <sup>1</sup>  | 16087304 |  | 958.10 |

|    |                                                                                                                                |          |                                                                                      |        |
|----|--------------------------------------------------------------------------------------------------------------------------------|----------|--------------------------------------------------------------------------------------|--------|
| 24 | (1E,4Z,6E)-7-[4-(3-fluoropropoxy)-3-methoxyphenyl]-5-hydroxy-1-(4-hydroxy-3-methoxyphenyl)hepta-1,4,6-trien-3-one <sup>1</sup> | 16087306 | 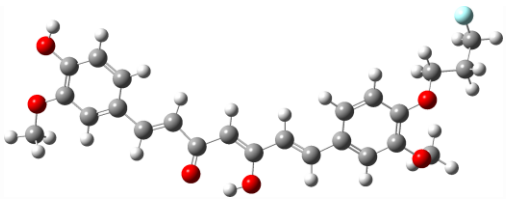   | 0.07   |
| 25 | Thioflavin T <sup>5</sup>                                                                                                      | 16954    |    | 116.00 |
| 26 | 4-(1,3-benzothiazol-2-yl)aniline <sup>4</sup>                                                                                  | 234475   |    | 37.00  |
| 27 | Pittsburgh Compound-B <sup>9</sup>                                                                                             | N/A      |    | 4.3    |
| 28 | CHEMBL94230 <sup>4</sup>                                                                                                       | 9835167  |  | 4.90   |
| 29 | CHEMBL93334 <sup>4</sup>                                                                                                       | 9837643  |  | 11.00  |
| 30 | CHEMBL81260 <sup>3</sup>                                                                                                       | 9839907  |  | 10.30  |

**Table S2.** Average interaction energies (kcal/mol) of each ligand with their surroundings at the bound and free states along their calculated LIE and experimental binding free energies.

| Pubchem ID               | $\langle V_{l-s}^{vdW} \rangle_b$ | $\langle V_{l-s}^{vdW} \rangle_f$ | $\langle V_{l-s}^{elec} \rangle_b$ | $\langle V_{l-s}^{elec} \rangle_f$ | $\Delta G_{exp}$ |
|--------------------------|-----------------------------------|-----------------------------------|------------------------------------|------------------------------------|------------------|
| 10064445                 | -34.0                             | -17.4                             | -16.2                              | -23.7                              | -10.6            |
| 10133297                 | -42.6                             | -23.4                             | -11.1                              | -15.4                              | -10.7            |
| 10184360                 | -42.2                             | -19.6                             | -114.1                             | -144.9                             | -13.7            |
| 10335228                 | -34.5                             | -18.8                             | -10.3                              | -23.3                              | -11.2            |
| 10422457                 | -37.0                             | -22.1                             | -5.9                               | -10.3                              | -11.0            |
| 10426074                 | -39.9                             | -22.8                             | -6.2                               | -10.5                              | -12.0            |
| 10444413                 | -28.1                             | -15.8                             | -27.8                              | -30.7                              | -10.1            |
| 10496851                 | -42.0                             | -24.8                             | -4.2                               | -9.2                               | -12.0            |
| 10844298                 | -48.3                             | -29.7                             | -6.7                               | -12.5                              | -11.3            |
| 11054105                 | -37.0                             | -23.0                             | -7.5                               | -14.5                              | -9.1             |
| 11129817                 | -43.2                             | -24.0                             | -4.8                               | -12.1                              | -12.0            |
| 11574659                 | -41.1                             | -25.5                             | -14.3                              | -16.3                              | -10.8            |
| 11632242                 | -39.7                             | -23.4                             | -14.6                              | -21.2                              | -10.5            |
| 11703303                 | -32.4                             | -20.0                             | -21.3                              | -27.1                              | -9.8             |
| 11821524                 | -37.9                             | -23.4                             | -11.4                              | -16.9                              | -11.1            |
| 1358096                  | -43.7                             | -26.5                             | -6.0                               | -12.1                              | -11.0            |
| 15521136                 | -38.3                             | -18.0                             | -124.4                             | -146.1                             | -13.3            |
| 15521135                 | -37.0                             | -17.9                             | -121.0                             | -139.2                             | -13.6            |
| 15521137                 | -37.2                             | -18.0                             | -121.6                             | -138.4                             | -13.1            |
| 156391<br>(Naproxen)     | -24.2                             | -10.9                             | -70.8                              | -87.8                              | -11.3            |
| 16087292                 | -37.7                             | -24.4                             | -12.8                              | -22.2                              | -8.9             |
| 16087303                 | -30.3                             | -19.1                             | -14.1                              | -22.1                              | -9.1             |
| 16087304                 | -38.7                             | -22.2                             | -9.7                               | -20.9                              | -8.3             |
| 16087306                 | -49.9                             | -33.1                             | -11.4                              | -34.1                              | -13.9            |
| 16954<br>(Thioflavin T)  | -37.7                             | -25.5                             | -10.1                              | -7.2                               | -9.5             |
| 234475                   | -27.9                             | -15.9                             | -21.9                              | -24.5                              | -10.2            |
| Pittsburgh<br>Compound-B | -38.4                             | -19.6                             | -18.0                              | -21.7                              | -11.5            |
| 9835167                  | -39.8                             | -22.7                             | -9.6                               | -14.6                              | -11.4            |
| 9837643                  | -34.0                             | -20.5                             | -6.4                               | -11.5                              | -10.9            |
| 9839907                  | -40.0                             | -23.6                             | -6.6                               | -13.8                              | -11.0            |

**Table S3.** Binding free energies of each ligand with 12A $\beta_{11-40}$  oligomer by using MM/PBSA and FEP methods.

| <i>Pubchem ID</i>        | $\Delta E_{vdW}$ | $\Delta E_{Elec}$ | $\Delta G_{sur}$ | $\Delta G_{PB}$ | $-T\Delta S$ | $\Delta G_{MM/PBSA}$ | $\Delta G_{FEP}$ |
|--------------------------|------------------|-------------------|------------------|-----------------|--------------|----------------------|------------------|
| 10064445                 | 1.55             | -38.67            | -4.58            | 18.51           | 26.95        | 3.76                 | -8.16            |
| 10133297                 | -4.54            | -37.20            | -4.88            | 12.83           | 27.13        | -6.65                | -20.65           |
| 10184360                 | 312.96           | -45.13            | -7.58            | -283.12         | 29.04        | 6.18                 | -33.85           |
| 10335228                 | -3.00            | -37.59            | -4.80            | 21.95           | 26.23        | 2.79                 | -16.99           |
| 10422457                 | -2.42            | -37.71            | -5.14            | 20.49           | 26.51        | 1.72                 | -17.54           |
| 10426074                 | -7.37            | -43.16            | -4.95            | 22.49           | 26.94        | -6.05                | -24.34           |
| 10444413                 | -11.90           | -33.58            | -4.39            | 24.71           | 26.92        | 1.77                 | -5.75            |
| 10496851                 | -3.80            | -44.44            | -5.27            | 20.97           | 26.97        | -5.57                | -24.71           |
| 10844298                 | -4.29            | -52.35            | -6.34            | 16.81           | 27.98        | -18.18               | -26.50           |
| 11054105                 | -4.62            | -41.57            | -5.44            | 20.81           | 27.25        | -3.56                | -19.63           |
| 11129817                 | -4.56            | -42.93            | -5.46            | 20.97           | 27.22        | -4.76                | -24.24           |
| 11574659                 | -3.81            | -43.55            | -5.69            | 27.06           | 27.55        | 1.57                 | -23.04           |
| 11632242                 | -2.77            | -40.57            | -5.33            | 21.15           | 27.05        | -0.47                | -11.30           |
| 11703303                 | -9.25            | -31.67            | -5.16            | 21.53           | 26.49        | 1.94                 | -8.02            |
| 11821524                 | -3.57            | -40.56            | -5.31            | 22.24           | 26.91        | -0.29                | -27.77           |
| 1358096                  | -3.80            | -45.01            | -5.51            | 15.31           | 27.13        | -11.87               | -28.56           |
| 15521136                 | 286.71           | -37.26            | -5.82            | -281.41         | 28.70        | -9.08                | -30.28           |
| 15521135                 | 334.64           | -36.85            | -6.22            | -322.03         | 28.54        | -1.92                | -26.71           |
| 15521137                 | 289.18           | -36.43            | -6.79            | -278.45         | 28.17        | -4.33                | -35.85           |
| 156391<br>(Naproxen)     | 130.35           | -35.23            | -4.54            | -126.29         | 27.50        | -8.21                | -17.73           |
| 16087292                 | -6.52            | -40.37            | -6.20            | 22.22           | 28.05        | -2.84                | -26.27           |
| 16087303                 | -13.53           | -36.35            | -5.22            | 31.31           | 27.23        | 3.45                 | -14.23           |
| 16087304                 | -4.31            | -40.20            | -5.74            | 21.72           | 28.58        | 0.05                 | -5.75            |
| 16087306                 | -20.55           | -57.46            | -7.96            | 49.47           | 30.65        | -5.85                | -29.05           |
| 16954<br>(Thioflavin T)  | -216.02          | -31.36            | -4.71            | 229.23          | 27.24        | 4.38                 | -11.41           |
| 234475                   | -15.03           | -29.18            | -4.41            | 27.54           | 25.73        | 4.65                 | -16.37           |
| Pittsburgh<br>Compound-B | -9.85            | -40.89            | -4.72            | 26.48           | 26.81        | -2.18                | -24.69           |
| 9835167                  | -11.15           | -37.99            | -5.04            | 30.55           | 26.85        | 3.22                 | -18.35           |
| 9837643                  | -6.67            | -34.73            | -4.51            | 17.17           | 26.45        | -2.29                | -19.43           |
| 9839907                  | -5.46            | -44.66            | -5.26            | 26.10           | 27.16        | -2.11                | -24.21           |

**Table S4.** The binding free energies was estimated using LIE and experimental approaches of training set comprising of 20 complexes. In particular, the parameter  $\alpha$ ,  $\beta$ , and  $\gamma$  were assigned as shown as equation (2) of the main text. The unit is of kcal/mol.

| Pubchem ID | $\Delta G_{LIE}$ | $\Delta G_{exp}$ |
|------------|------------------|------------------|
| 10064445   | -11.05           | -10.57           |
| 10184360   | -13.91           | -13.67           |
| 10335228   | -11.04           | -11.18           |
| 10426074   | -11.01           | -12.04           |
| 10444413   | -9.57            | -10.07           |
| 10844298   | -11.52           | -11.35           |
| 11054105   | -10.26           | -9.08            |
| 11574659   | -10.49           | -10.82           |
| 11632242   | -10.92           | -10.49           |
| 11703303   | -9.75            | -9.80            |
| 1358096    | -11.14           | -10.98           |
| 15521136   | -12.80           | -13.34           |
| 15521135   | -12.28           | -13.57           |
| 156391     | -10.54           | -11.32           |
| 16087303   | -9.51            | -9.10            |
| 16087304   | -11.17           | -8.26            |
| 16954      | -9.25            | -9.52            |
| 234475     | -9.49            | -10.20           |
| 9835167    | -11.06           | -11.41           |
| 9839907    | -10.95           | -10.96           |



**Table S5.** The binding free energies was estimated using LIE and experimental approaches of testing set comprising of 10 complexes. In particular, the parameter  $\alpha$ ,  $\beta$ , and  $\gamma$  were assigned as shown as equation (2) of the main texts. The unit is of kcal/mol.

| Pubchem ID             | $\Delta G_{LIE}$ | $\Delta G_{exp}$ |
|------------------------|------------------|------------------|
| 10133297               | -11.64           | -10.74           |
| 10496851               | -11.09           | -11.97           |
| 11821524               | -10.35           | -11.07           |
| 15521137               | -12.24           | -13.13           |
| 16087306               | -11.84           | -13.94           |
| 2-phenylbenzothiazoles | -11.47           | -11.48           |
| 10422457               | -10.40           | -10.98           |
| 16087292               | -10.19           | -8.92            |
| 9837643                | -10.01           | -10.92           |
| 11129817               | -11.80           | -11.97           |

**Figure S1.** RMSD values during MD simulations.

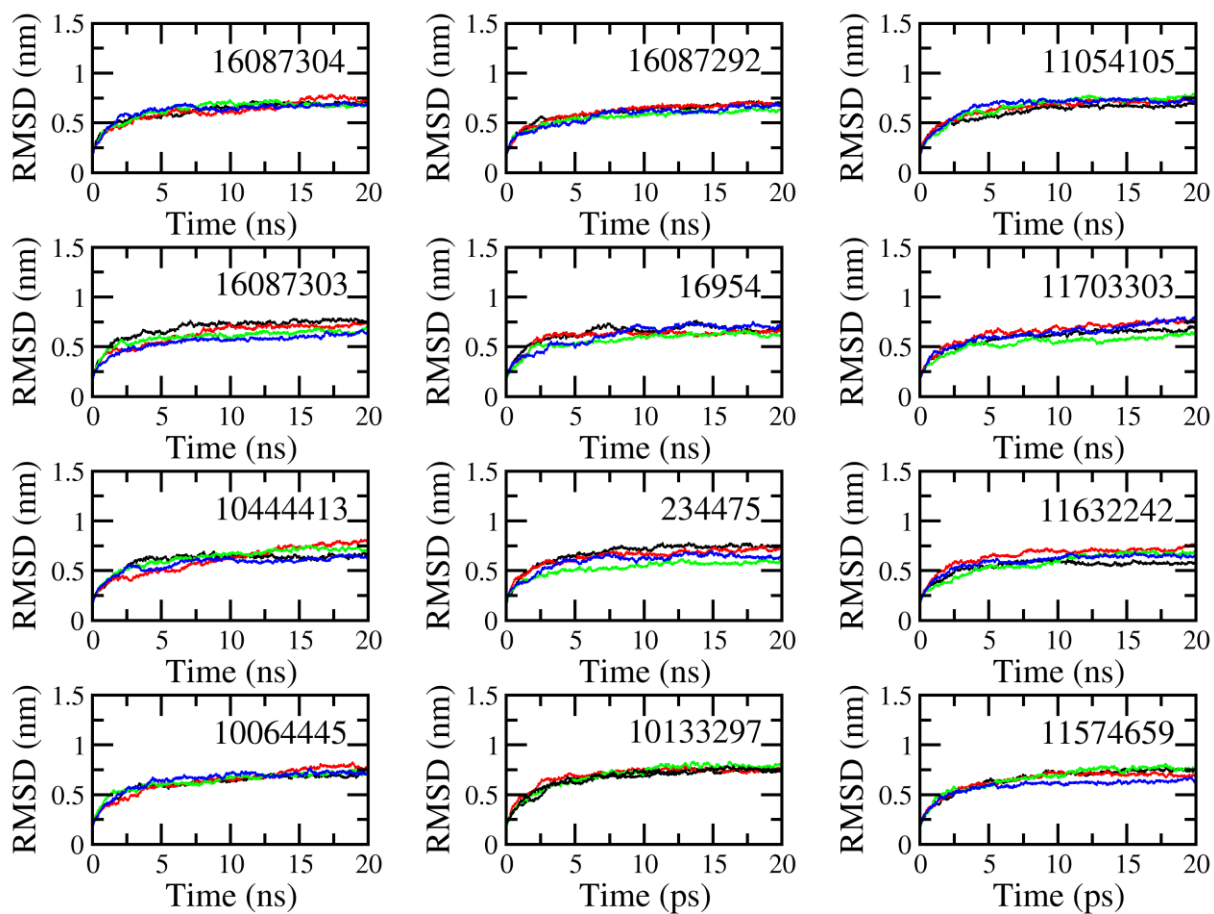

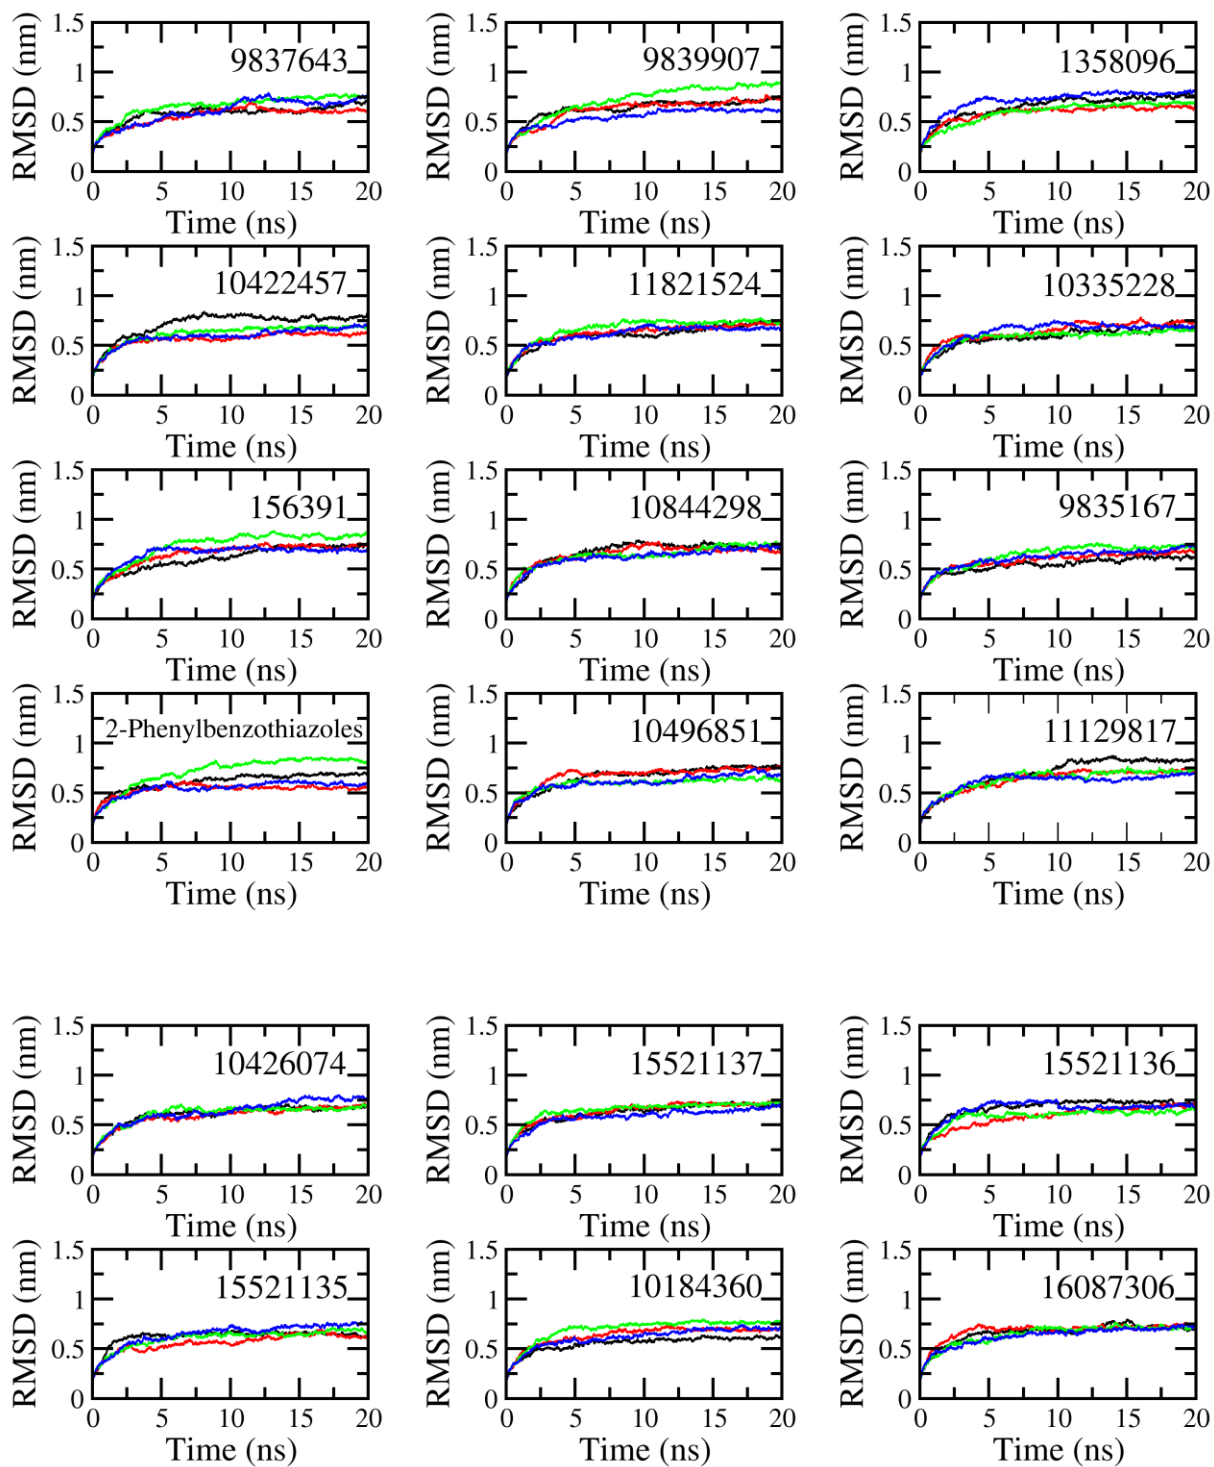

**Figure S2.** 2-D protein-ligand interaction diagrams

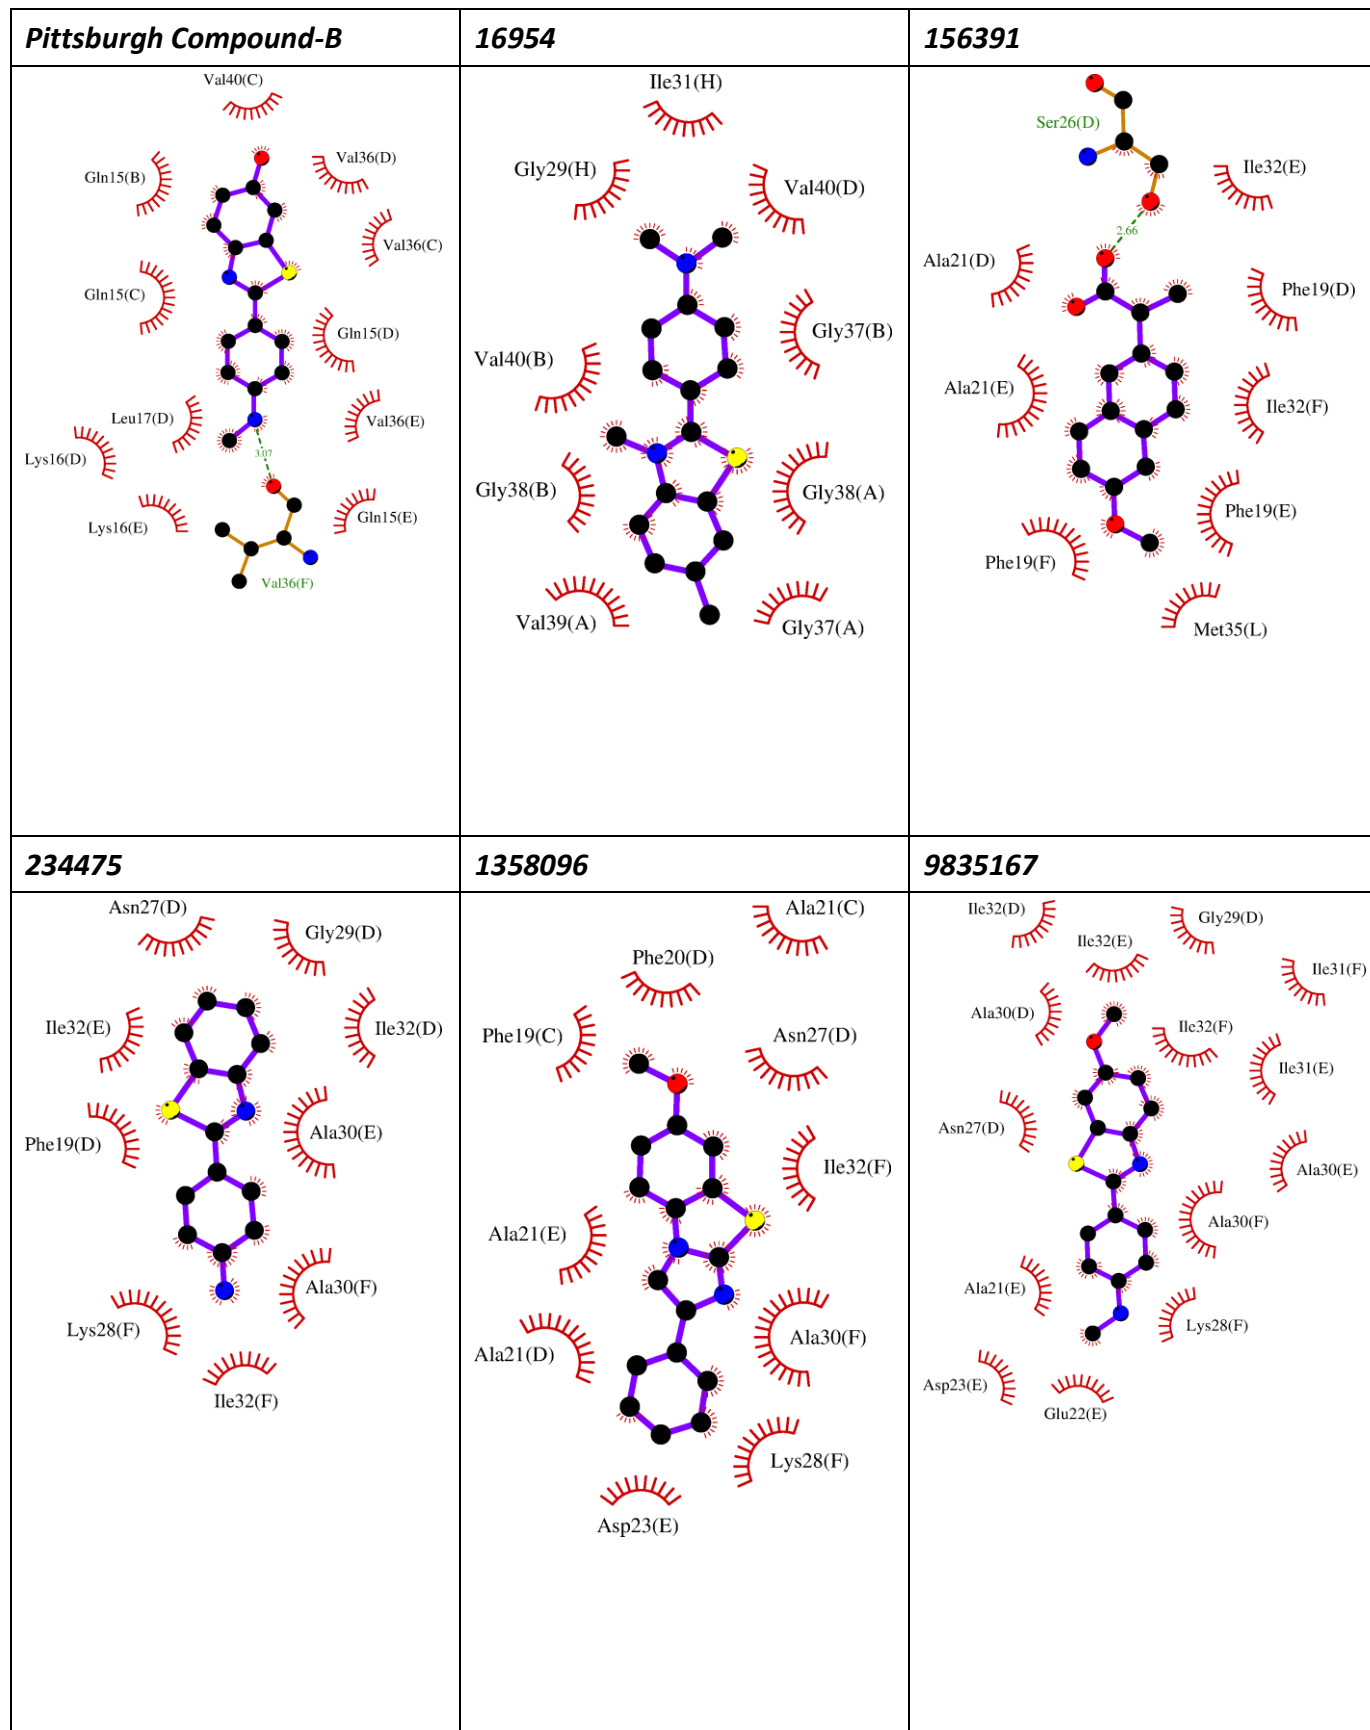

|                                                                                                                                                                                                                    |                                                                                                                                                                                                                                                                                                     |                                                                                                                                                                                                                                                  |
|--------------------------------------------------------------------------------------------------------------------------------------------------------------------------------------------------------------------|-----------------------------------------------------------------------------------------------------------------------------------------------------------------------------------------------------------------------------------------------------------------------------------------------------|--------------------------------------------------------------------------------------------------------------------------------------------------------------------------------------------------------------------------------------------------|
| <p><b>9837643</b></p> 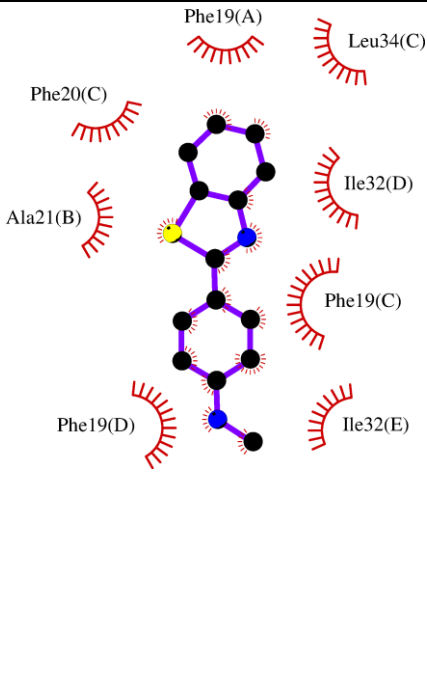 <p>Phe19(A)<br/>Leu34(C)<br/>Phe20(C)<br/>Ala21(B)<br/>Phe19(C)<br/>Phe19(D)<br/>Ile32(D)<br/>Ile32(E)</p> | <p><b>9839907</b></p>  <p>Glu22(D)<br/>Asn27(D)<br/>Ala21(D)<br/>Ala21(C)<br/>Phe20(C)<br/>Phe19(B)<br/>Ala21(A)</p>                                                                                              | <p><b>10064445</b></p>  <p>Met35(L)<br/>Val40(K)<br/>Gln15(K)<br/>Val36(K)<br/>Gln15(J)<br/>Val39(K)<br/>Gln15(I)<br/>Val40(J)<br/>Leu17(I)<br/>Lys16(J)</p>  |
| <p><b>10133297</b></p>  <p>Ile31(H)<br/>Ala30(H)<br/>Val40(C)<br/>Gly29(H)<br/>Gly38(A)<br/>Ile31(G)</p>                         | <p><b>10184360</b></p>  <p>Ala21(D)<br/>Phe19(E)<br/>Ala30(F)<br/>Ile32(F)<br/>Ile32(E)<br/>Asn27(D)<br/>Phe19(C)<br/>Leu34(D)<br/>Lys28(D)<br/>Ile32(D)<br/>Ala21(A)<br/>Leu34(C)<br/>Val24(A)<br/>Leu34(B)</p> | <p><b>10335228</b></p>  <p>Ala30(E)<br/>Phe19(D)<br/>Ser26(D)<br/>Ile32(E)<br/>Phe20(C)<br/>Phe19(C)<br/>Phe19(B)<br/>Ala21(B)<br/>Leu34(D)<br/>Phe20(B)</p> |
| <p><b>10422457</b></p>                                                                                                                                                                                             | <p><b>10426074</b></p>                                                                                                                                                                                                                                                                              | <p><b>10444413</b></p>                                                                                                                                                                                                                           |

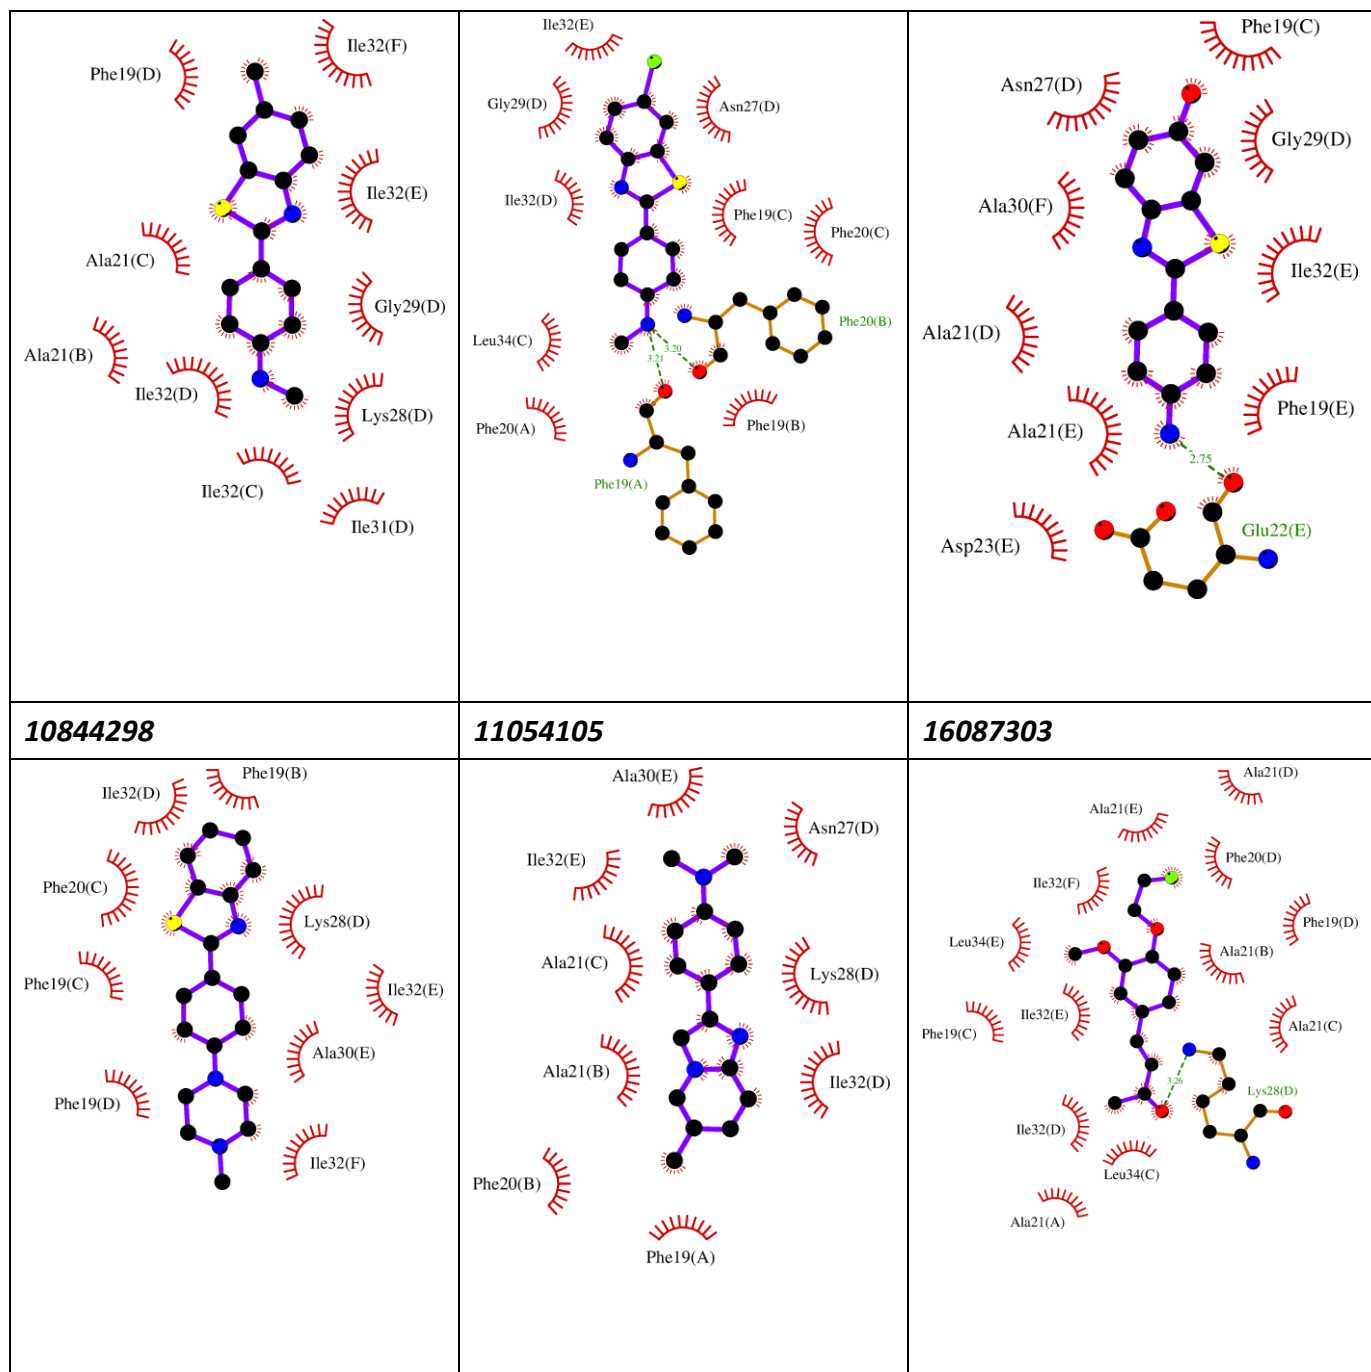

**Figure S3.** Number of HBs during MD simulations.

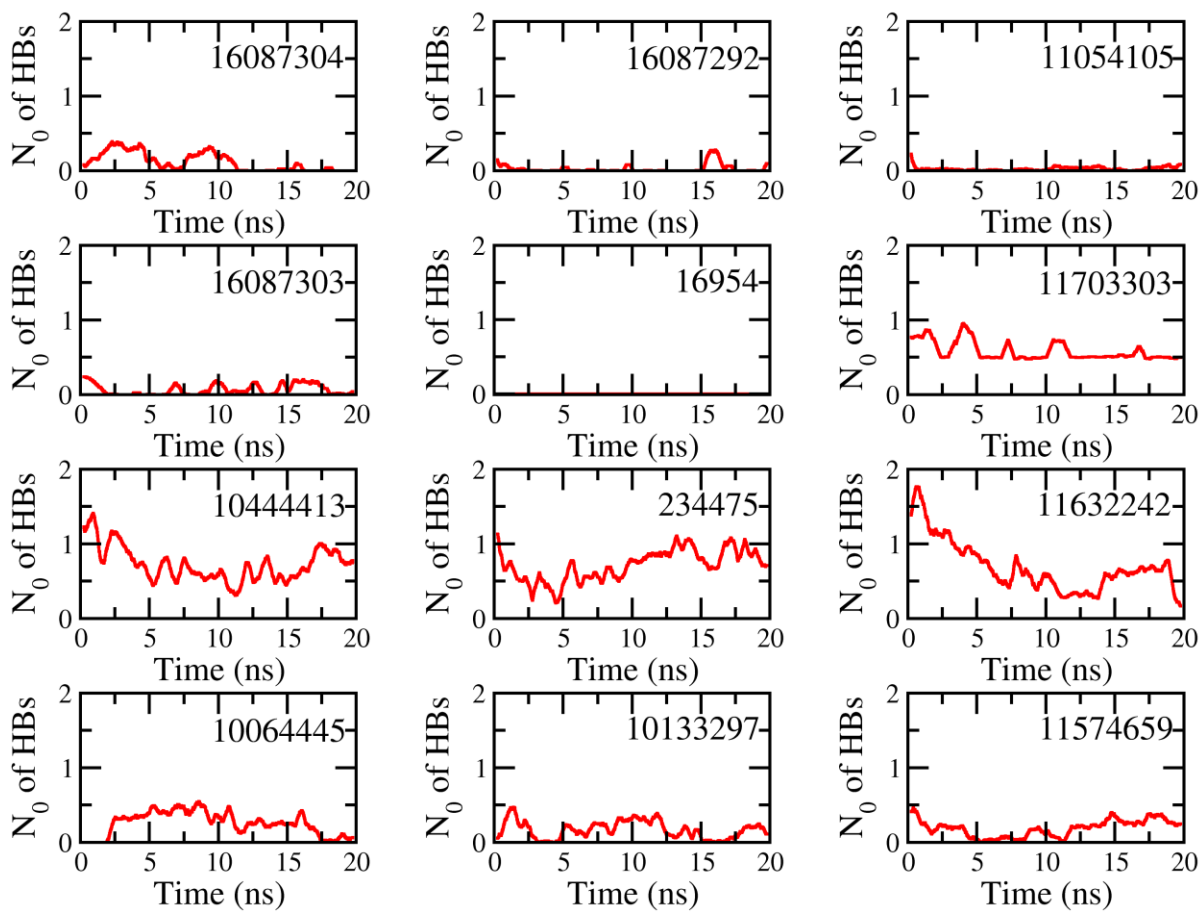

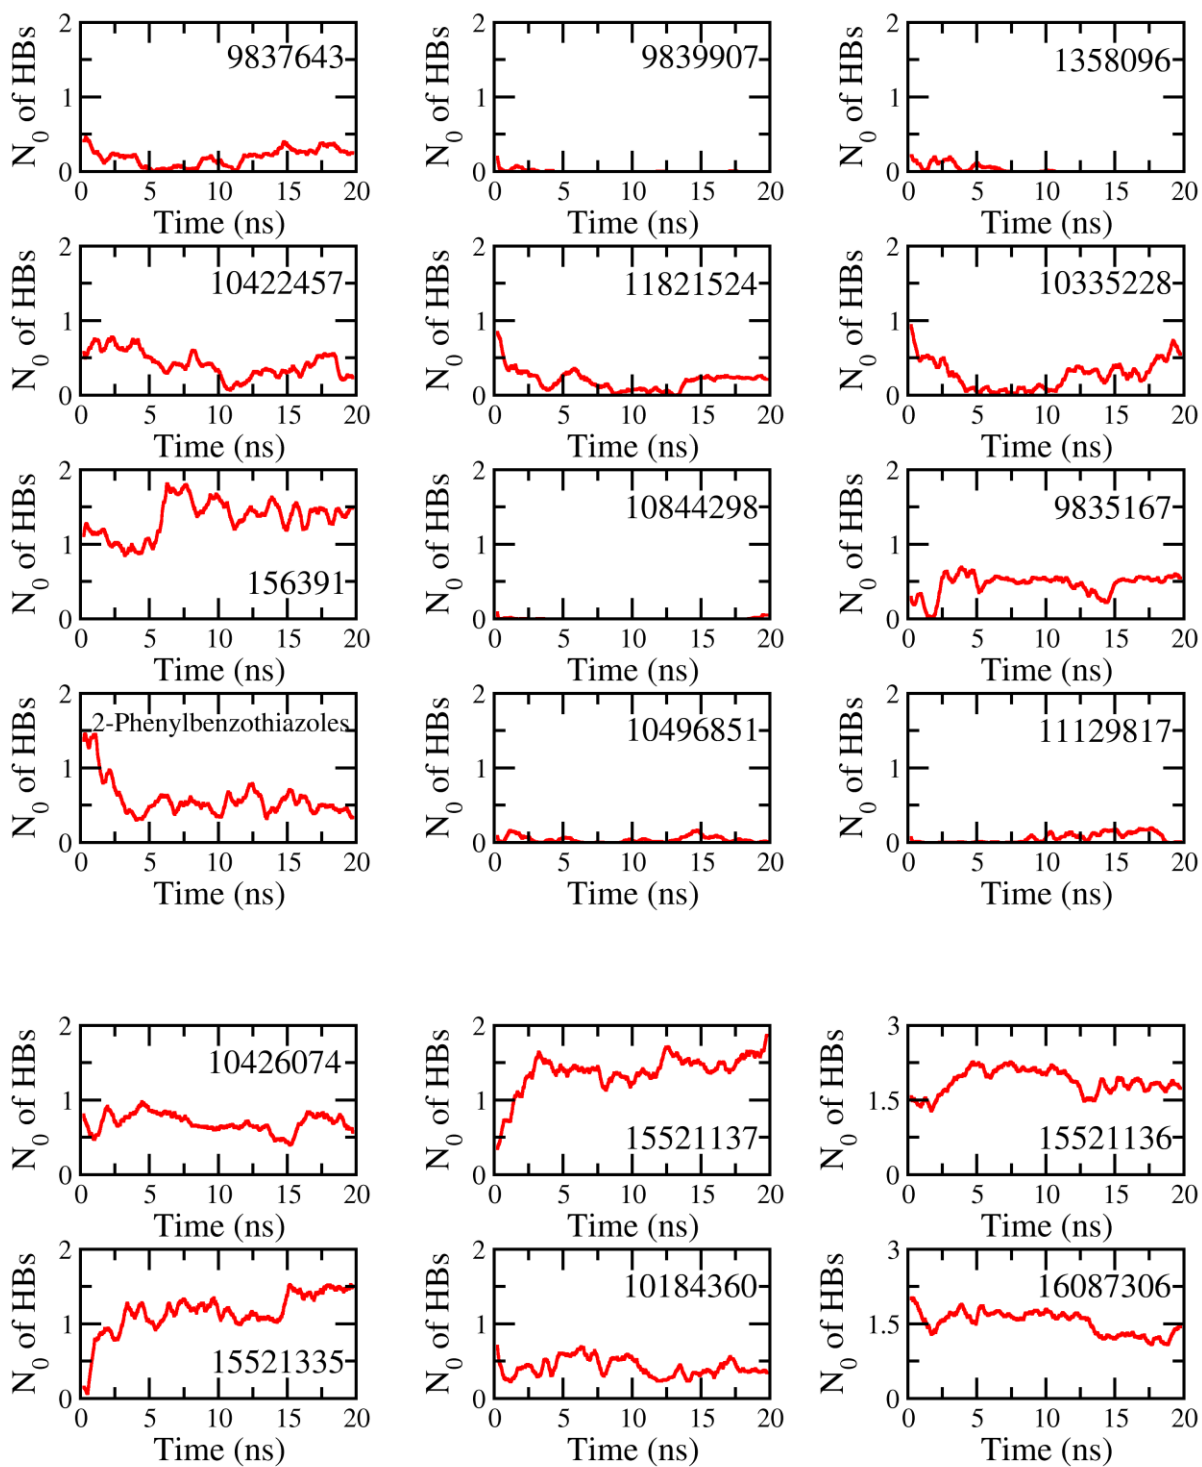



**Figure S4.** Correlation between experimental binding free energies and that calculated using LIE model with the separation of  $\beta$  value (eq. 3)

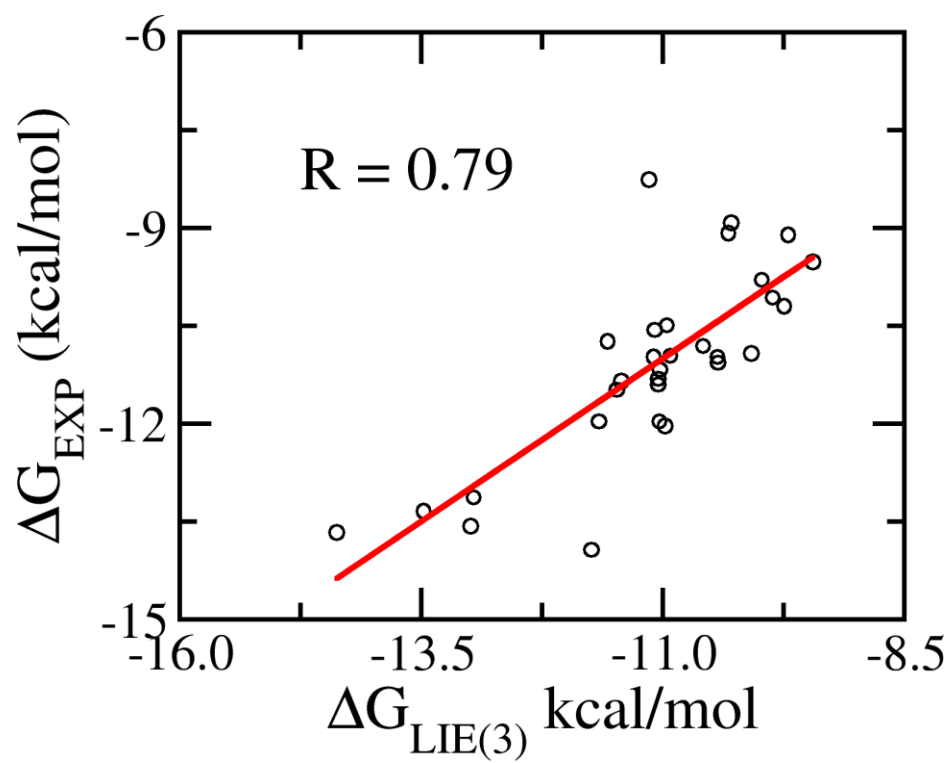

## References

1. E. K. Ryu, Y. S. Choe, K. H. Lee, Y. Choi and B. T. Kim, *J. Med. Chem.*, 2006, **49**, 6111-6119.
2. C.-W. Lee, Z.-P. Zhuang, M.-P. Kung, K. Plössl, D. Skovronsky, T. Gur, C. Hou, J. Q. Trojanowski, V. M. Y. Lee and H. F. Kung, *J Med Chem*, 2001, **44**, 2270-2275.
3. Z. P. Zhuang, M. P. Kung, A. Wilson, C. W. Lee, K. Plossl, C. Hou, D. M. Holtzman and H. F. Kung, *J. Med. Chem.*, 2003, **46**, 237-243.
4. C. A. Mathis, Y. M. Wang, D. P. Holt, G. F. Huang, M. L. Debnath and W. E. Klunk, *J Med Chem*, 2003, **46**, 2740-2754.
5. Z. P. Zhuang, M. P. Kung, C. Hou, D. M. Skovronsky, T. L. Gur, K. Plossl, J. Q. Trojanowski, V. M. Y. Lee and H. F. Kung, *J. Med. Chem.*, 2001, **44**, 1905-1914.
6. M. Ono, N. Yoshida, K. Ishibashi, M. Haratake, Y. Arano, H. Mori and M. Nakayama, *J. Med. Chem.*, 2005, **48**, 7253-7260.
7. D. Alagille, H. DaCosta, R. M. Baldwin and G. D. Tamagnan, *Bioorganic Med. Chem. Lett.*, 2011, **21**, 2966-2968.
8. E. D. Agdeppa, V. Kepe, A. Petric, N. Satyamurthy, J. Liu, S. C. Huang, G. W. Small, G. M. Coled and J. R. Barrio, *Neuroscience*, 2003, **117**, 723-730.
9. K.-S. Lin, M. L. Debnath, C. A. Mathis and W. E. Klunk, *Bioorganic & Medicinal Chemistry Letters*, 2009, **19**, 2258-2262.
